# Supplementary material
Source: PubMed Central journal article supplement (PMC4875874)
Supplement: NIHMS768481-supplement-01.pdf [file NIHMS768481-supplement-01.pdf]

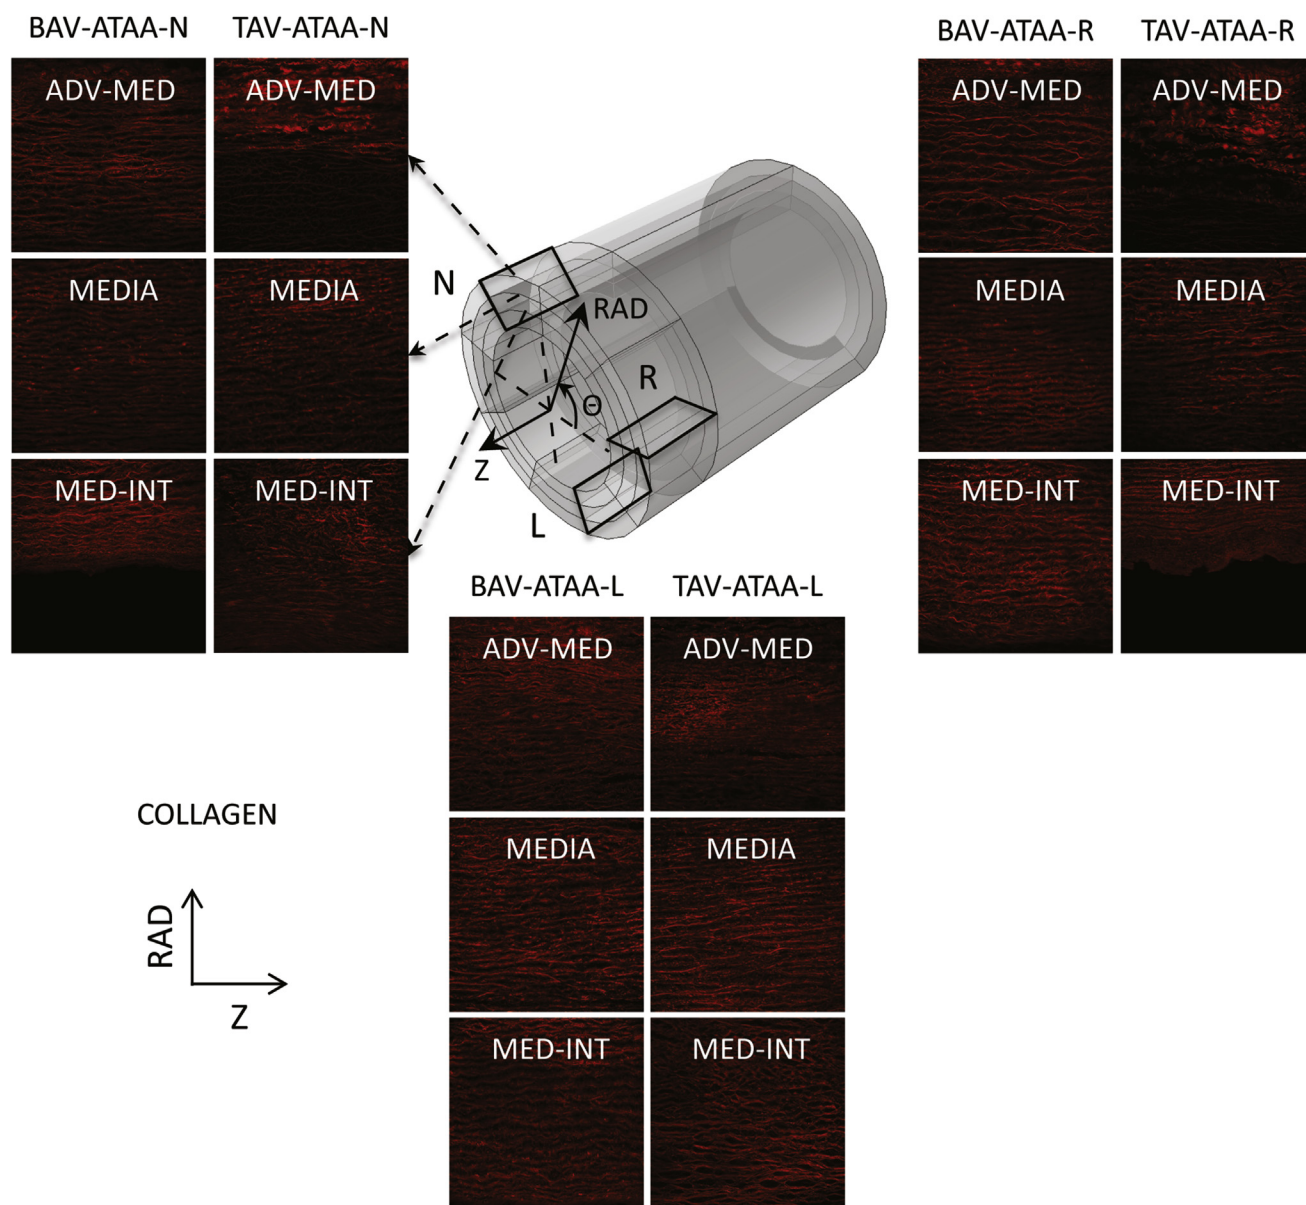

**FIGURE E1.** The collagen (red) channel of Figure 2. *BAV-ATAA-N*, Bicuspid aortic valve ascending thoracic aortic aneurysm circumferential region with respect to noncoronary sinus; *TAV-ATAA-N*, tricuspid aortic valve ascending thoracic aortic aneurysm circumferential region with respect to noncoronary sinus; *Adv-med*, adventitia-media layer; *Med-int*, media-intima layer; *N*, circumferential region with respect to noncoronary sinus; *RAD*, radial; *Z*, circumferential-longitudinal plane;  $\Theta$ , circumferential; *R*, circumferential region with respect to right coronary sinus; *L*, circumferential region with respect to left coronary sinus; *BAV-ATAA-R*, bicuspid aortic valve ascending thoracic aortic aneurysm circumferential region with respect to right coronary sinus; *TAV-ATAA-R*, tricuspid aortic valve ascending thoracic aortic aneurysm circumferential region with respect to right coronary sinus; *BAV-ATAA-L*, bicuspid aortic valve ascending thoracic aortic aneurysm circumferential region with respect to left coronary sinus; *TAV-ATAA-L*, tricuspid aortic valve ascending thoracic aortic aneurysm circumferential region with respect to left coronary sinus.

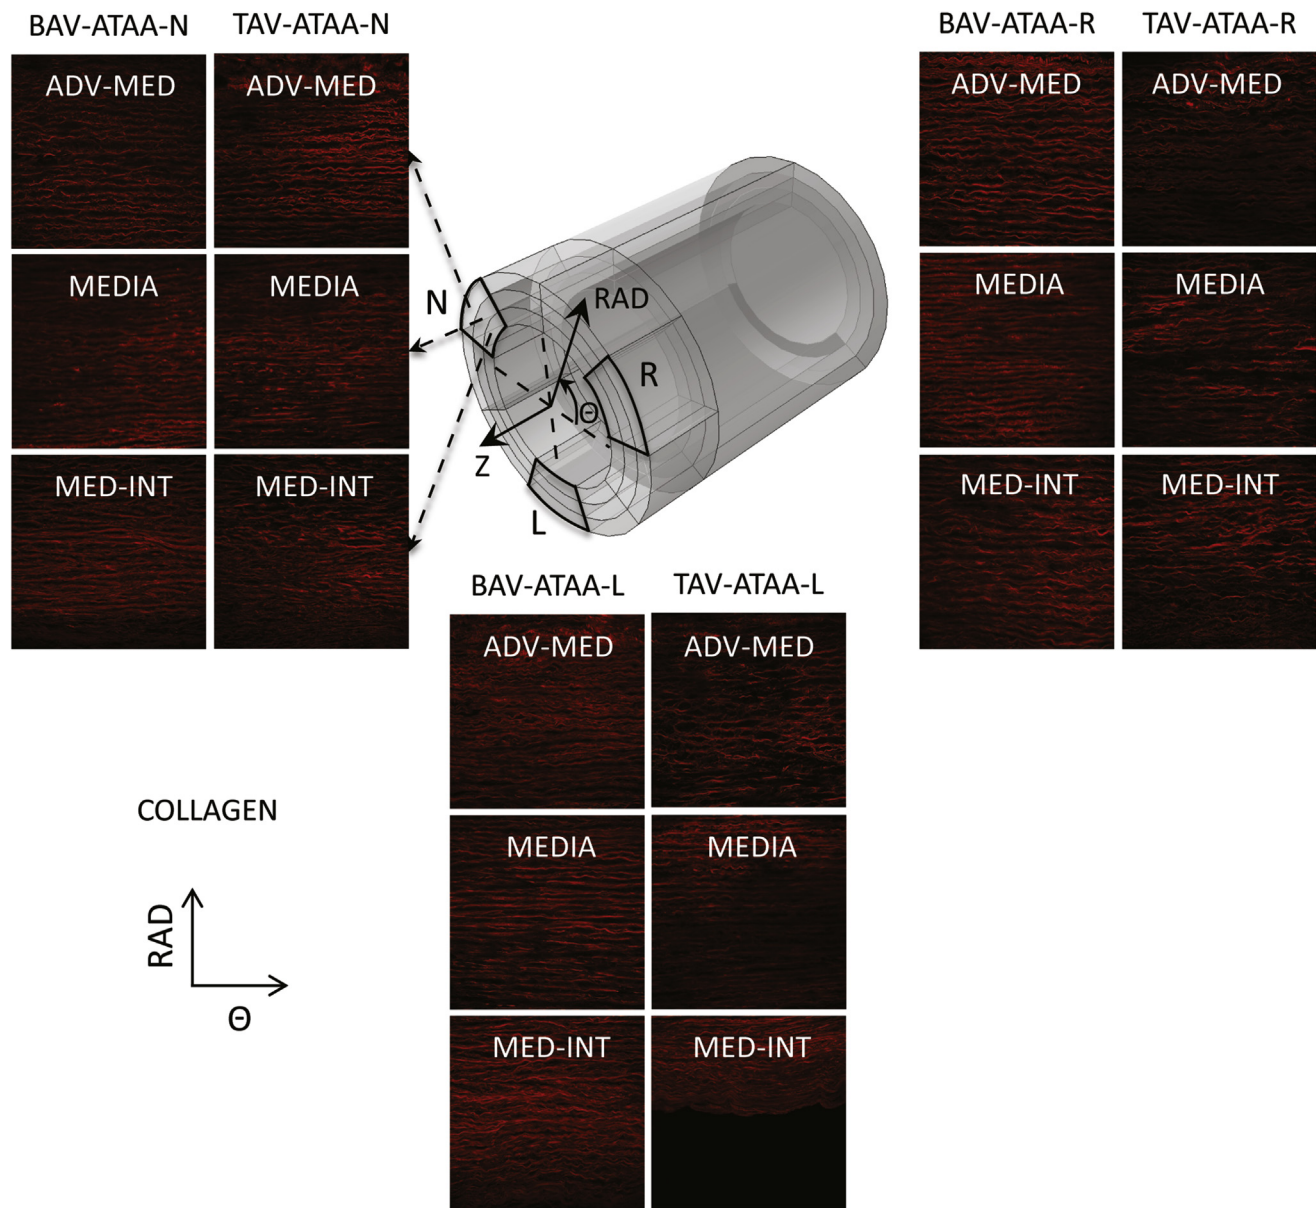

**FIGURE E2.** The collagen (red) channel of Figure 3. *BAV-ATAA-N*, Bicuspid aortic valve ascending thoracic aortic aneurysm circumferential region with respect to noncoronary sinus; *TAV-ATAA-N*, tricuspid aortic valve ascending thoracic aortic aneurysm circumferential region with respect to noncoronary sinus; *Adv-med*, adventitia-media layer; *Med-int*, media-intima layer; *N*, circumferential region with respect to noncoronary sinus; *RAD*, radial; *Z*, circumferential-longitudinal plane;  $\Theta$ , circumferential; *R*, circumferential region with respect to right coronary sinus; *L*, circumferential region with respect to left coronary sinus; *BAV-ATAA-R*, bicuspid aortic valve ascending thoracic aortic aneurysm circumferential region with respect to right coronary sinus; *TAV-ATAA-R*, tricuspid aortic valve ascending thoracic aortic aneurysm circumferential region with respect to right coronary sinus; *BAV-ATAA-L*, bicuspid aortic valve ascending thoracic aortic aneurysm circumferential region with respect to left coronary sinus; *TAV-ATAA-L*, tricuspid aortic valve ascending thoracic aortic aneurysm circumferential region with respect to left coronary sinus.

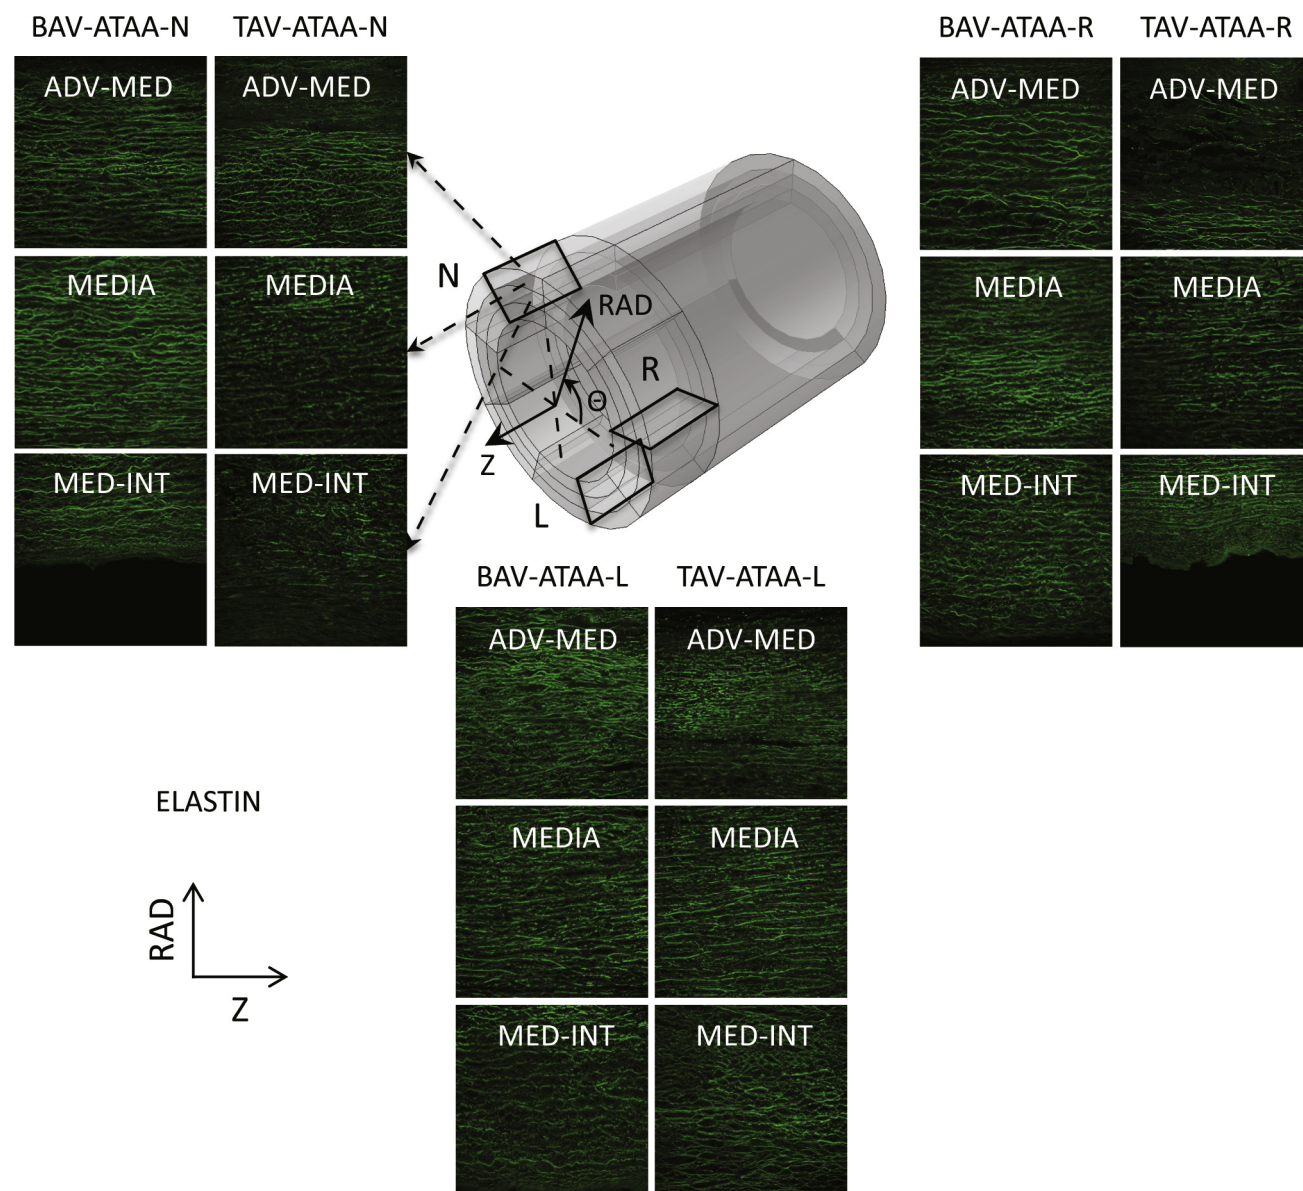

**FIGURE E3.** The elastin (green) channel of Figure 2. *BAV-ATAA-N*, Bicuspid aortic valve ascending thoracic aortic aneurysm circumferential region with respect to noncoronary sinus; *TAV-ATAA-N*, tricuspid aortic valve ascending thoracic aortic aneurysm circumferential region with respect to noncoronary sinus; *Adv-med*, adventitia-media layer; *Med-int*, media-intima layer; *N*, circumferential region with respect to noncoronary sinus; *RAD*, radial; *Z*, circumferential-longitudinal plane;  $\theta$ , circumferential; *R*, circumferential region with respect to right coronary sinus; *L*, circumferential region with respect to left coronary sinus; *BAV-ATAA-R*, bicuspid aortic valve ascending thoracic aortic aneurysm circumferential region with respect to right coronary sinus; *TAV-ATAA-R*, tricuspid aortic valve ascending thoracic aortic aneurysm circumferential region with respect to right coronary sinus; *BAV-ATAA-L*, bicuspid aortic valve ascending thoracic aortic aneurysm circumferential region with respect to left coronary sinus; *TAV-ATAA-L*, tricuspid aortic valve ascending thoracic aortic aneurysm circumferential region with respect to left coronary sinus.

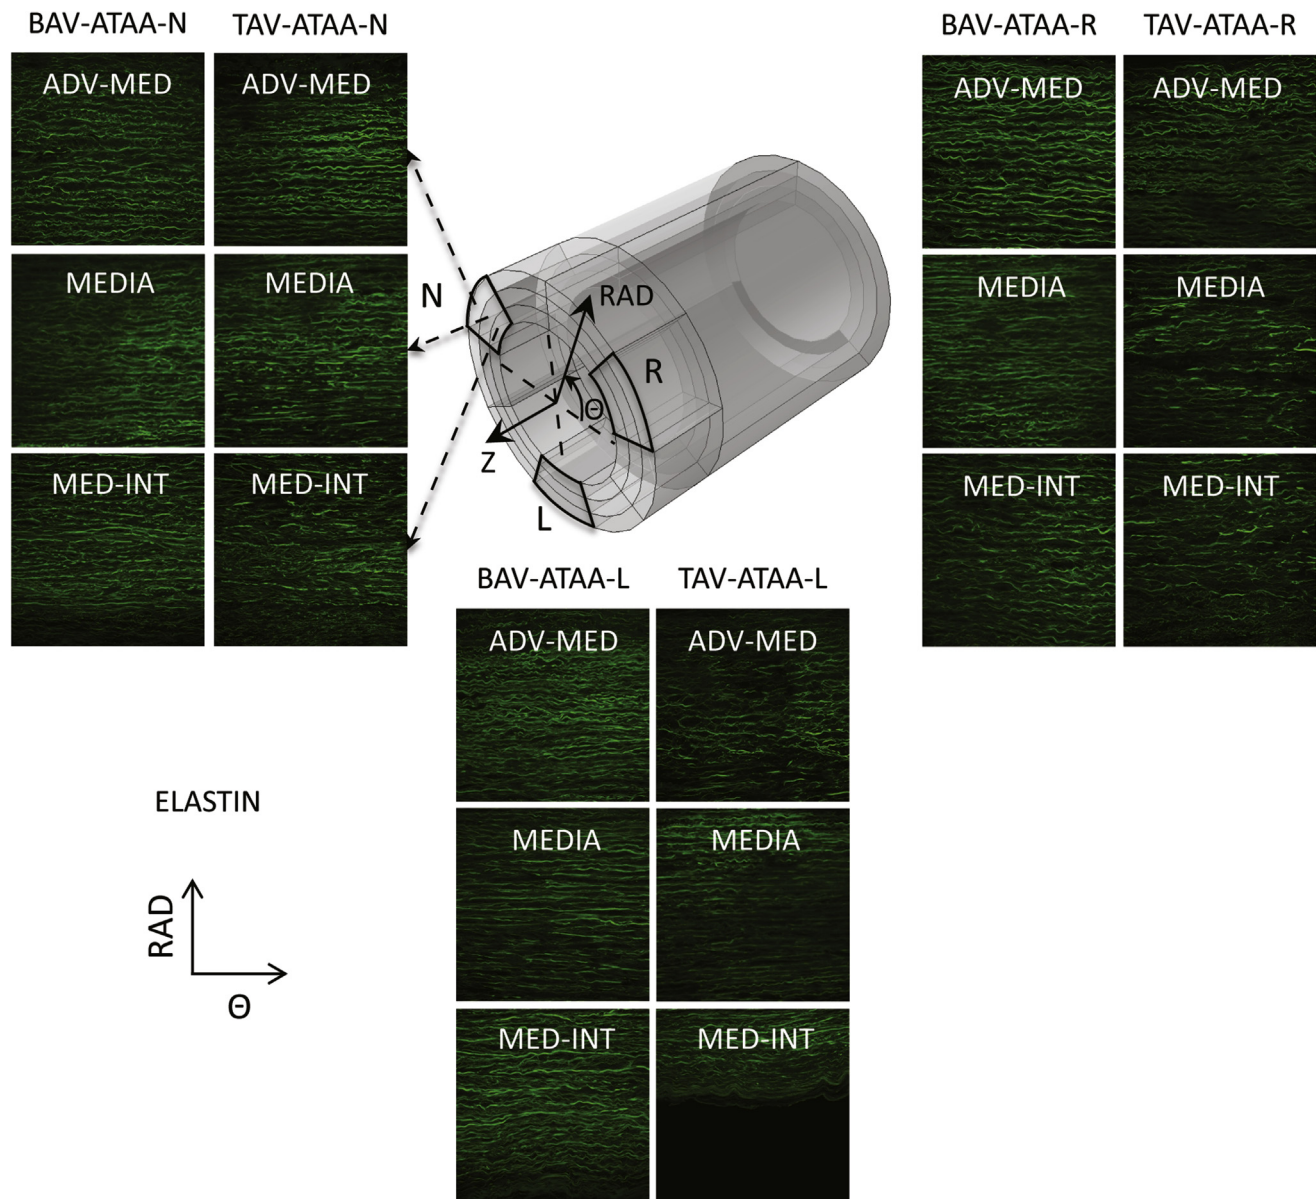

**FIGURE E4.** The elastin (green) channel of Figure 3. *BAV-ATAA-N*, Bicuspid aortic valve ascending thoracic aortic aneurysm circumferential region with respect to noncoronary sinus; *TAV-ATAA-N*, tricuspid aortic valve ascending thoracic aortic aneurysm circumferential region with respect to noncoronary sinus; *Adv-med*, adventitia-media layer; *Med-int*, media-intima layer; *N*, circumferential region with respect to noncoronary sinus; *RAD*, radial; *Z*, circumferential-longitudinal plane; *Θ*, circumferential; *R*, circumferential region with respect to right coronary sinus; *L*, circumferential region with respect to left coronary sinus; *BAV-ATAA-R*, bicuspid aortic valve ascending thoracic aortic aneurysm circumferential region with respect to right coronary sinus; *TAV-ATAA-R*, tricuspid aortic valve ascending thoracic aortic aneurysm circumferential region with respect to right coronary sinus; *BAV-ATAA-L*, bicuspid aortic valve ascending thoracic aortic aneurysm circumferential region with respect to left coronary sinus; *TAV-ATAA-L*, tricuspid aortic valve ascending thoracic aortic aneurysm circumferential region with respect to left coronary sinus.

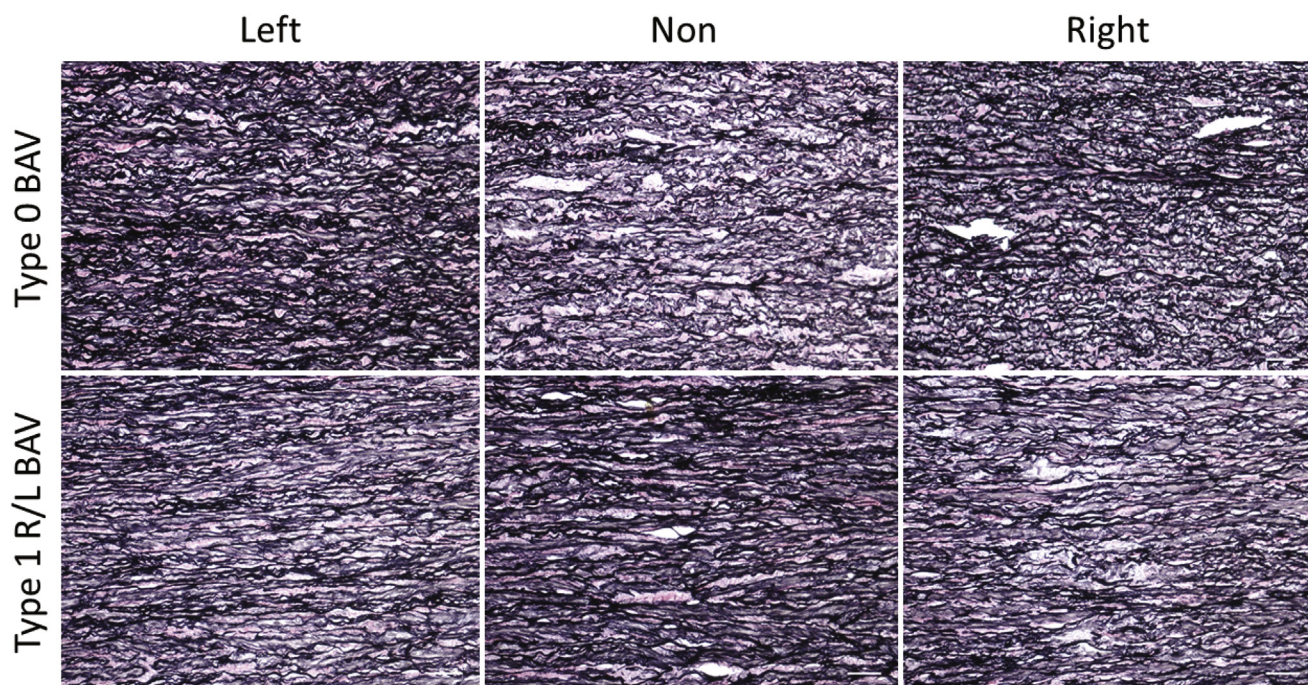

**FIGURE E5.** Human ascending thoracic aortic specimens from 3 circumferential regions with respect to proximity to the aortic valve cusps (left coronary [Left], noncoronary [Non], and right coronary [Right]) from 2 bicuspid aortic valve (BAV) patients displaying the 2 most common morphotypes (type 0, top row, and type 1 right/left, bottom row). Five micron sections of formalin-fixed and paraffin-embedded specimens were evaluated for elastin composition and integrity using Verhoff-Van Gieson's stain. Specimens were visualized using bright field microscopy and a 20 $\times$  objective. More extensive cystic medial degeneration was noted for regions Non and Right for BAV patients exhibiting both morphotypes. Scale bars = 50  $\mu$ m.
